# Supplementary material for: The Role of Urban–Rural Connections in Building Food System Resilience
Source: MDPI journal article supplement (doi:10.3390/su15031818), 2023-01-18
Supplement: s1 [file s1]

Archive with 1 entries (1 files):
- sustainability-2148626-supplementary.pdf
